# Supplementary material for: Tunnel Encapsulation Technology for Durability Improvement in Stretchable Electronics Fabrication
Source: MDPI journal article supplement (doi:10.3390/mi9100519), 2018-10-14
Supplement: s1 [file s1]

# Supplementary Materials: Tunnel Encapsulation Technology for Durability Improvement in Stretchable Electronics Fabrication

Kangmin Leng, Chuanfei Guo, Kang Wu and Zhigang Wu

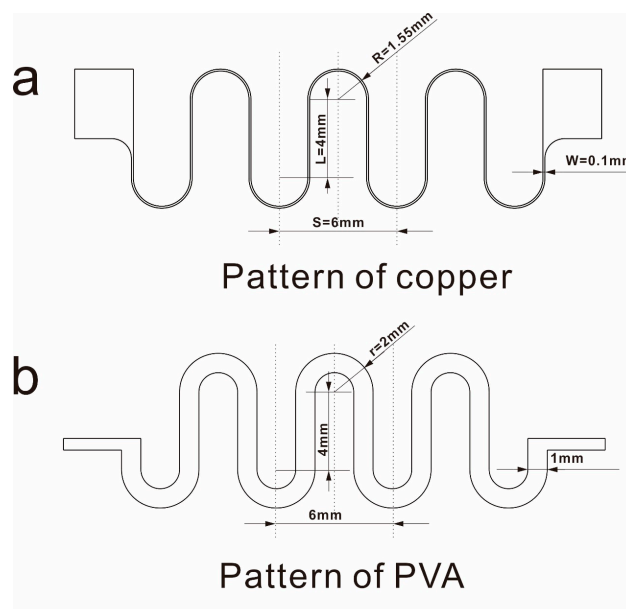

Figure S1. (a) Pattern of copper; (b) Pattern of Polyvinyl Alcohol (PVA).

Finite element analyses (FEA):

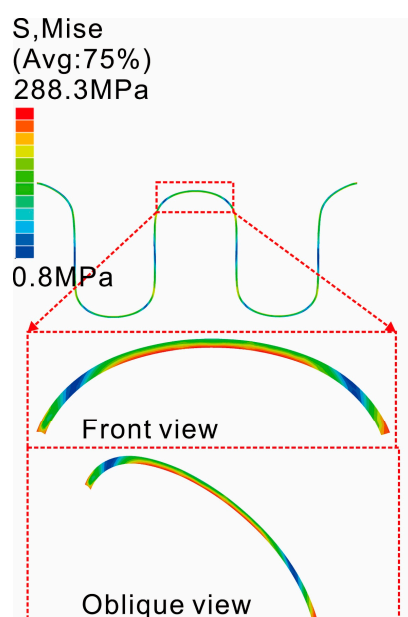

Figure S2. Stress distributions and strain contours of the interconnects with direct encapsulation at 30% elongation.

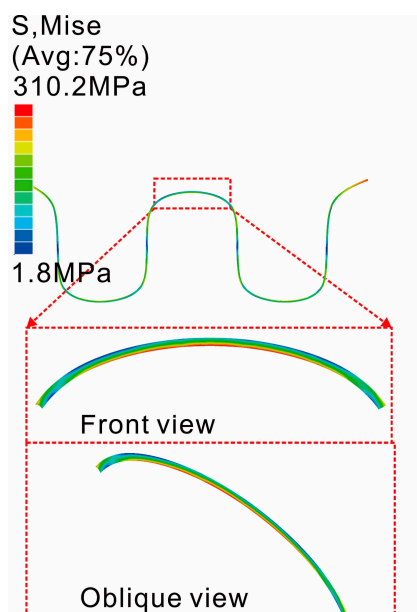

**Figure S3.** Stress distributions and strain contours of the interconnects with direct encapsulation at 50% elongation.

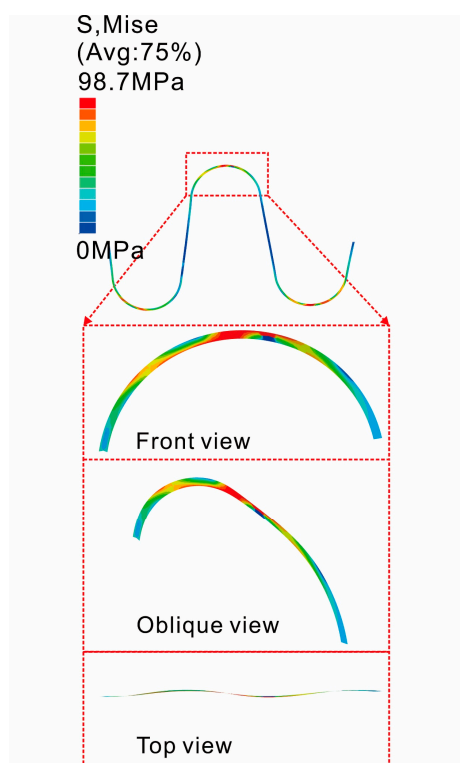

**Figure S4.** Stress distributions and strain contours of the interconnects with tunnel encapsulation at 30% elongation.

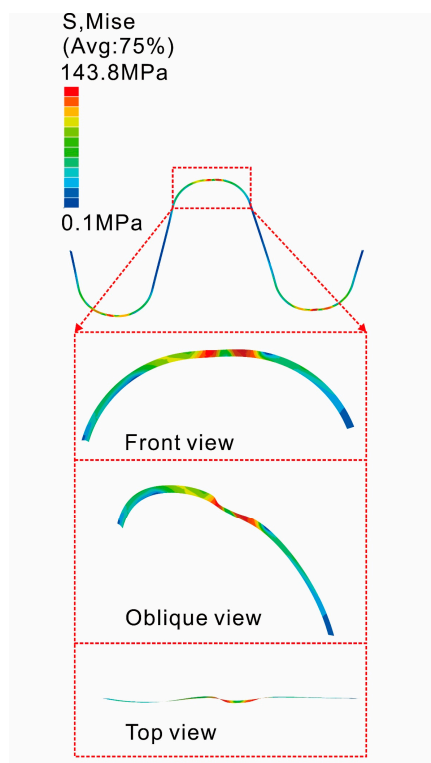

**Figure S5.** Stress distributions and strain contours of the interconnects with tunnel encapsulation at 50% elongation.

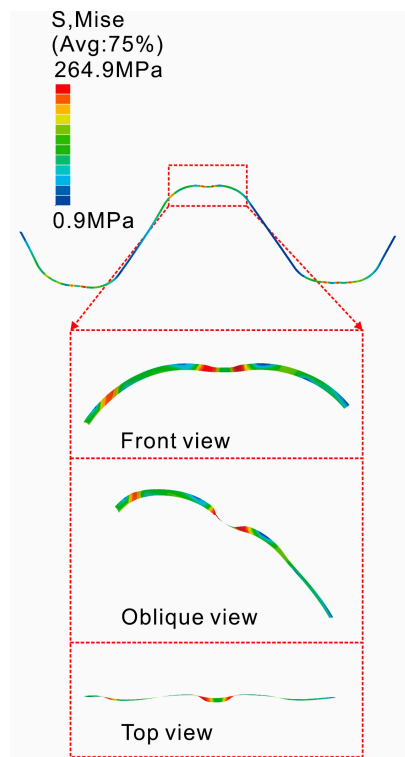

**Figure S6.** Stress distributions and strain contours of the interconnects with tunnel encapsulation at 100% elongation.

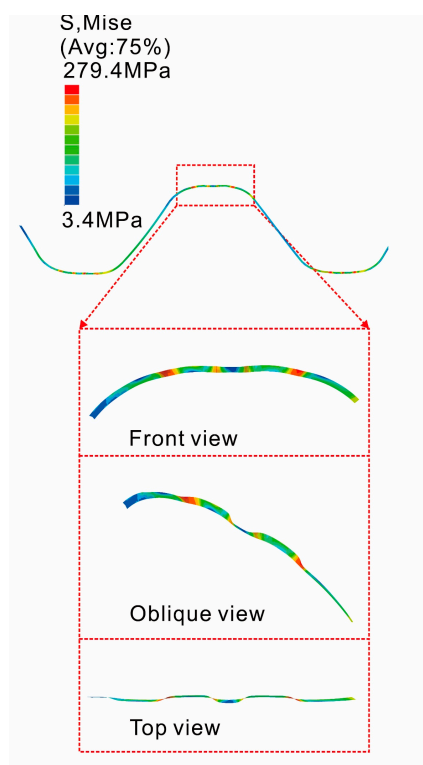

**Figure S7.** Stress distributions and strain contours of the interconnects with tunnel encapsulation at 110% elongation.
